# Supplementary material for: Effects of subconscious and conscious emotions on human cue–reward association learning
Source: PubMed Central journal article supplement (PMC4329552; doi:10.1038/srep08478), 2015-02-16
Supplement: srep08478-s1.pdf [file srep08478-s1.pdf]

# **Effects of subconscious and conscious emotions on human cue– reward association learning**

Noriya Watanabe<sup>1, 2, 3</sup>, Masahiko Haruno<sup>1, 4\*</sup>

## **Affiliations:**

<sup>1</sup>Center for Information and Neural Networks, National Institute of Information and Communications Technology, Suita, Osaka 565-0871, Japan

<sup>2</sup>Japan Society for Promotion of Science

<sup>3</sup>Graduate School of Environmental Studies, Nagoya University

<sup>4</sup>Japan Science and Technology Agency

## **\*Correspondence:**

**Dr. Masahiko Haruno**  
**NICT Cinet 1-4 Yamadaoka**  
**Suita, Osaka 565-0871**  
**Japan**

**Tel: +816-6879-4428**

**E-Mail: mharuno@nict.go.jp**

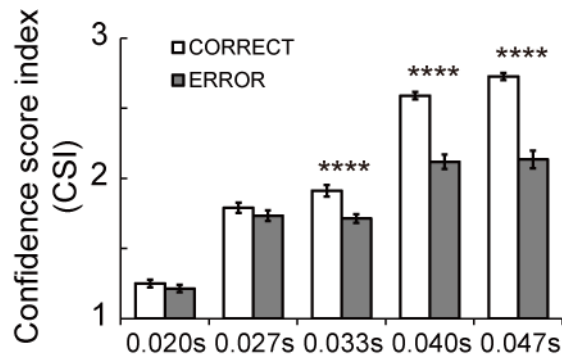

**Supplementary Figure S1. Confidence score indices sorted by discrimination performance.**

The results of confidence score index (CSI) were sorted based on discrimination performance. This analysis showed that the CSI in the 0.020 s and 0.027 s conditions were not statistically different between correct and error trials (paired t-test, 0.020 s:  $t_{(90)} = 1.577$ ,  $p \approx 1.000$ , 0.027 s:  $t_{(90)} = 1.549$ ,  $p \approx 1.000$  with BC), but were significantly different in other conditions (paired t-test, 0.033 s:  $t_{(90)} = 6.012$ ,  $p < 0.0001$ , 0.040 s:  $t_{(90)} = 8.981$ ,  $p < 0.0001$ , 0.047 s:  $t_{(90)} = 8.564$ ,  $p < 0.0001$  with BC).
